# Supplementary material for: Study of Dispersion and Adsorption of Aerosols during Oral Practice
Source: Research Square preprint supplement (doi:10.21203/rs.3.rs-3480808/v1), 2023-10-26
Supplement: Supplementary file 1 [file 63608b5c0e420499401aeb59.xlsx]

## Sheet: The data in Fig. 5
Aerosol diffusion experimental data	a. Maximum flow velocity of aerosols
		1	2	3
	Oral zoning	Maximum flow velocity (m/s)	Maximum flow velocity (m/s)	Maximum flow velocity (m/s)	Errors
	BSOZ1	3.9	3.96	3.79	0.0703957
	PSOZ1	3.4	3.47	3.31	0.0654896
	BSOZ2	6.2	6.26	5.94	0.138884
	PSOZ2	5.8	5.86	5.65	0.0883176
	BSOZ3	3.6	3.65	3.51	0.0579272
	PSOZ3	3.3	3.35	3.23	0.0492161
	BSOZ4	3.5	3.57	3.41	0.0654896
	PSOZ4	3.2	3.28	3.14	0.0573488
	BSOZ5	5.5	5.58	5.33	0.104243
	PSOZ5	5	5.08	4.88	0.0821922
	BSOZ6	4	4.05	3.97	0.0329983
	PSOZ6	3.3	3.35	3.28	0.0294392
	Average flow velocity (m/s)	4.225	4.28833	4.12
	b. horizontal diffusion distance of aerosols
		1	2	3
	Oral zoning	Horizontal displacement (m)	Horizontal displacement (m)	Horizontal displacement (m)	Errors
	BSOZ1	0.36	0.366	0.351	0.00616441
	PSOZ1	0.32	0.326	0.314	0.00489898
	BSOZ2	0.55	0.562	0.535	0.0110454
	PSOZ2	0.52	0.531	0.514	0.00703957
	BSOZ3	0.3	0.303	0.291	0.00509902
	PSOZ3	0.27	0.279	0.268	0.00478423
	BSOZ4	0.29	0.295	0.282	0.00535413
	PSOZ4	0.26	0.263	0.252	0.0046428
	BSOZ5	0.5	0.51	0.488	0.00899383
	PSOZ5	0.46	0.467	0.449	0.0074087
	BSOZ6	0.34	0.346	0.33	0.00659966
	PSOZ6	0.32	0.326	0.312	0.00573488
	Average horizontal displacement (m)	0.374167	0.381167	0.3655
	c. vertical diffusion distance of aerosols
		1	2	3
	Oral zoning	Vertical displacement (m)	Vertical displacement (m)	Vertical displacement (m)	Errors
	BSOZ1	0.24	0.245	0.235	0.00408248
	PSOZ1	0.21	0.217	0.208	0.00385861
	BSOZ2	0.33	0.338	0.322	0.00653197
	PSOZ2	0.3	0.304	0.292	0.00498888
	BSOZ3	0.21	0.224	0.208	0.00711805
	PSOZ3	0.19	0.192	0.182	0.00432049
	BSOZ4	0.2	0.205	0.194	0.00449691
	PSOZ4	0.18	0.185	0.178	0.00294392
	BSOZ5	0.31	0.315	0.302	0.00535413
	PSOZ5	0.28	0.284	0.273	0.00454606
	BSOZ6	0.24	0.245	0.236	0.00368179
	PSOZ6	0.2	0.204	0.196	0.00326599
	Average vertical displacement (m)	0.240833	0.2465	0.2355
	e. micro-cluster diffusion schematic of diffusion angle of aerosols
	Different regions	Diffusion angle（°）	Diffusion Angle（°）	Diffusion angle（°）	Error
	BSOZ1	110	111.5	107.2	1.78201
	PSOZ1	100	102.4	98.4	1.64384
	BSOZ2	130	131.4	126.2	2.19697
	PSOZ2	122	123.6	118.8	1.99555
	BSOZ3	110	111.4	107	1.83545
	PSOZ3	103	103.6	99.5	1.80801
	BSOZ4	113	114.4	109.2	2.19697
	PSOZ4	106	108.1	104.1	1.63367
	BSOZ5	129	130.2	125.1	2.17715
	PSOZ5	125	126.5	121.5	2.09497
	BSOZ6	107	109	104.7	1.75689
	PSOZ6	101	103.4	99.7	1.53261
	Average diffusion angle	113	114.625	110.117

## Sheet: Tables 1 and 2
Aerosol diffusion and adsorption simulation data	Table 1 Pressure variation and adsorption effectiveness of single-channel adsorption ports
	Channel adsorption pressure（Pa）	Total number of particles captured (particles)	Total number of escaped particles (particles)	Adsorption efficiency (%)
	-200	2136	864	59.5506
	-250	2233	767	65.6516
	-300	2315	685	70.4104
	-350	2382	618	74.0554
	-400	2427	573	76.3906
	Table 2 Pressure variation and adsorption effect for the three channels
	Main channel adsorption pressure（Pa）	Auxiliary channel adsorption pressure（Pa）	Total number of particles captured (particles)	Total number of escaped particles (particles)	Adsorption efficiency (%)
	-350	-100	2935	85	97.1039
	-350	-150	2977	23	99.2274
	-350	-200	2884	116	95.9778
	-350	-250	2779	221	92.0475

## Sheet: The data in Fig. 10
Aerosol adsorption experimental data	a.Mean value of fluorescein dot distribution per unit area under different conditions
	Mean value of fluorescein point distribution	Ground-no adsorption			Error	75cm-no adsorption			Error	Ground-Adsorption			Error	75cm-adsorption			Error	Adsorption efficiency
		1	2	3		1	2	3		1	2	3		1	2	3
	BSOZ3	6.3	6.5	5.92	0.240555	6.84	7.12	6.34	0.322628	0.13	0.137	0.124	0.00531246	0.15	0.157	0.142	0.00612826	0.978691
	PSOZ3	6.4	6.76	6.11	0.265874	6.89	7.18	6.38	0.33069	0.17	0.176	0.162	0.00573488	0.2	0.214	0.191	0.00946338	0.97216
	BSOZ4	6.35	6.64	6.02	0.253289	6.82	7.1	6.29	0.33589	0.11	0.115	0.104	0.00449691	0.13	0.137	0.123	0.00571548	0.981777
	PSOZ4	6.5	6.83	6.16	0.273537	6.92	7.25	6.4	0.349889	0.15	0.154	0.142	0.00498888	0.17	0.175	0.162	0.00535413	0.976155
																	Average adsorption efficiency	0.977196
	c.percentage of fluorescein dot size distribution when adsorption equipment was not used
	Fluorescein dot particle size
		≤20μm			Error	>20 and ≤50μm			Error	>50 and ≤100μm			Error	>100 and ≤200μm			Error
		1	2	3		1	2	3		1	2	3		1	2	3
	BSOZ3	0.08	0.091	0.0695	0.00877813	0.39	0.412	0.368	0.0179629	0.46	0.485	0.427	0.0237534	0.07	0.081	0.0598	0.00865692
	PSOZ3	0.06	0.072	0.05	0.00899383	0.36	0.39	0.328	0.0253158	0.48	0.515	0.443	0.0293977	0.1	0.1125	0.0865	0.0106171
	BSOZ4	0.07	0.083	0.0578	0.0102896	0.38	0.416	0.36	0.0231709	0.48	0.513	0.427	0.0354244	0.49	0.5332	0.4668	0.0275145
	PSOZ4	0.07	0.086	0.054	0.0130639	0.1	0.111	0.087	0.00980929	0.07	0.078	0.067	0.0046428	0.11	0.1252	0.0968	0.0116038
	d.percentage of fluorescein dot size distribution when adsorption equipment was used at 75 cm
	Fluorescein dot particle size
		≤20μm			Error	>20 and ≤50μm			Error	>50 and ≤100μm			Error	>100 and ≤200μm			Error
		1	2	3		1	2	3		1	2	3		1	2	3
	BSOZ3	0	0	0	0	0.02	0.0212	0.0186	0.00106249	0.05	0.0545	0.0445	0.00408928	0.93	0.9623	0.8777	0.034858
	PSOZ3	0	0	0	0	0	0	0	0	0.04	0.0455	0.0365	0.00370435	0.96	0.9832	0.8768	0.0456818
	BSOZ4	0	0	0	0	0.02	0.0221	0.0185	0.00147648	0.06	0.0652	0.0538	0.00466	0.92	0.9636	0.8744	0.0364188
	PSOZ4	0	0	0	0	0.01	0.0113	0.0096	0.000725718	0.05	0.0544	0.0436	0.00443421	0.94	0.9855	0.8875	0.0400423
